# Supplementary material for: Optimization of green deep eutectic solvent (DES) extraction of Chenopodium quinoa Willd. husks saponins by response surface methodology and their antioxidant activities
Source: Royal Society of Chemistry journal article supplement (doi:10.1039/d3ra05949a), 2023-01-01
Supplement: d3ra05949a1.pdf [file d3ra05949a1.pdf]

Supplementary materials for

**Optimization of green deep eutectic solvent (DES) extraction of  
*Chenopodium quinoa* willd. husks saponins by response surface  
methodology and their antioxidant activities**

Yu-Qing Cai<sup>1#</sup>, Hui Gao<sup>1#</sup>, Lin-Meng Song<sup>1</sup>, Fei-Yan Tao<sup>1</sup>, Xue-Ying Ji<sup>1</sup>, Yuan  
Yu<sup>1</sup>, Yu-Qing Cao<sup>1</sup>, Shaojian Tang<sup>2\*</sup>, Peng Xue<sup>1\*</sup>

1. School of Community Health, Weifang Medical University, Shandong, 26104

2, PR China.

2. School of Pharmacy, Weifang Medical University, Shandong, 261042, PR C

hina.

# These authors contributed equally to this work.

\* Corresponding author.

E-mail address: tangsj@wfmc.edu.cn (S. Tang), jplxp26@126.com (P. Xue).

Tel: +86 0536-8462429

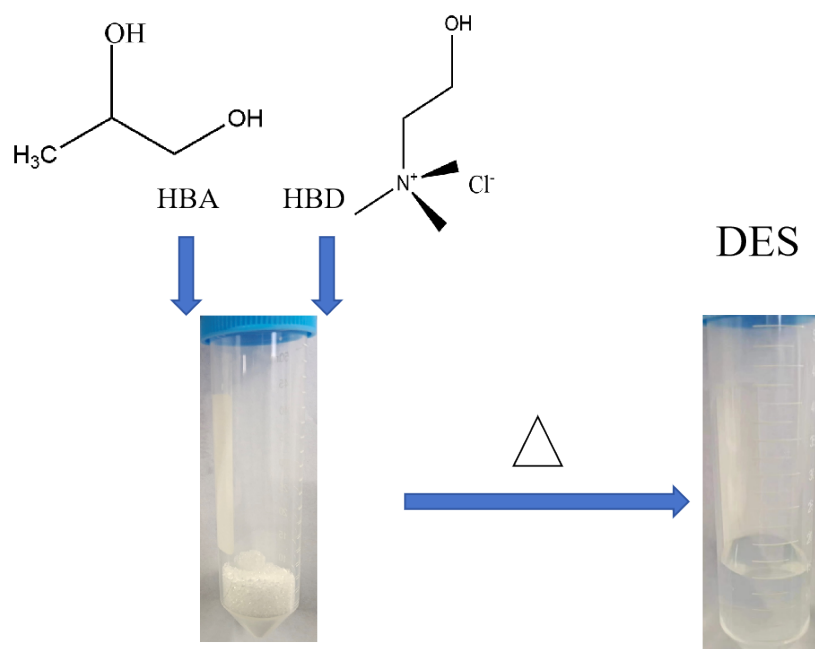

**Fig. S1.** DES preparation process

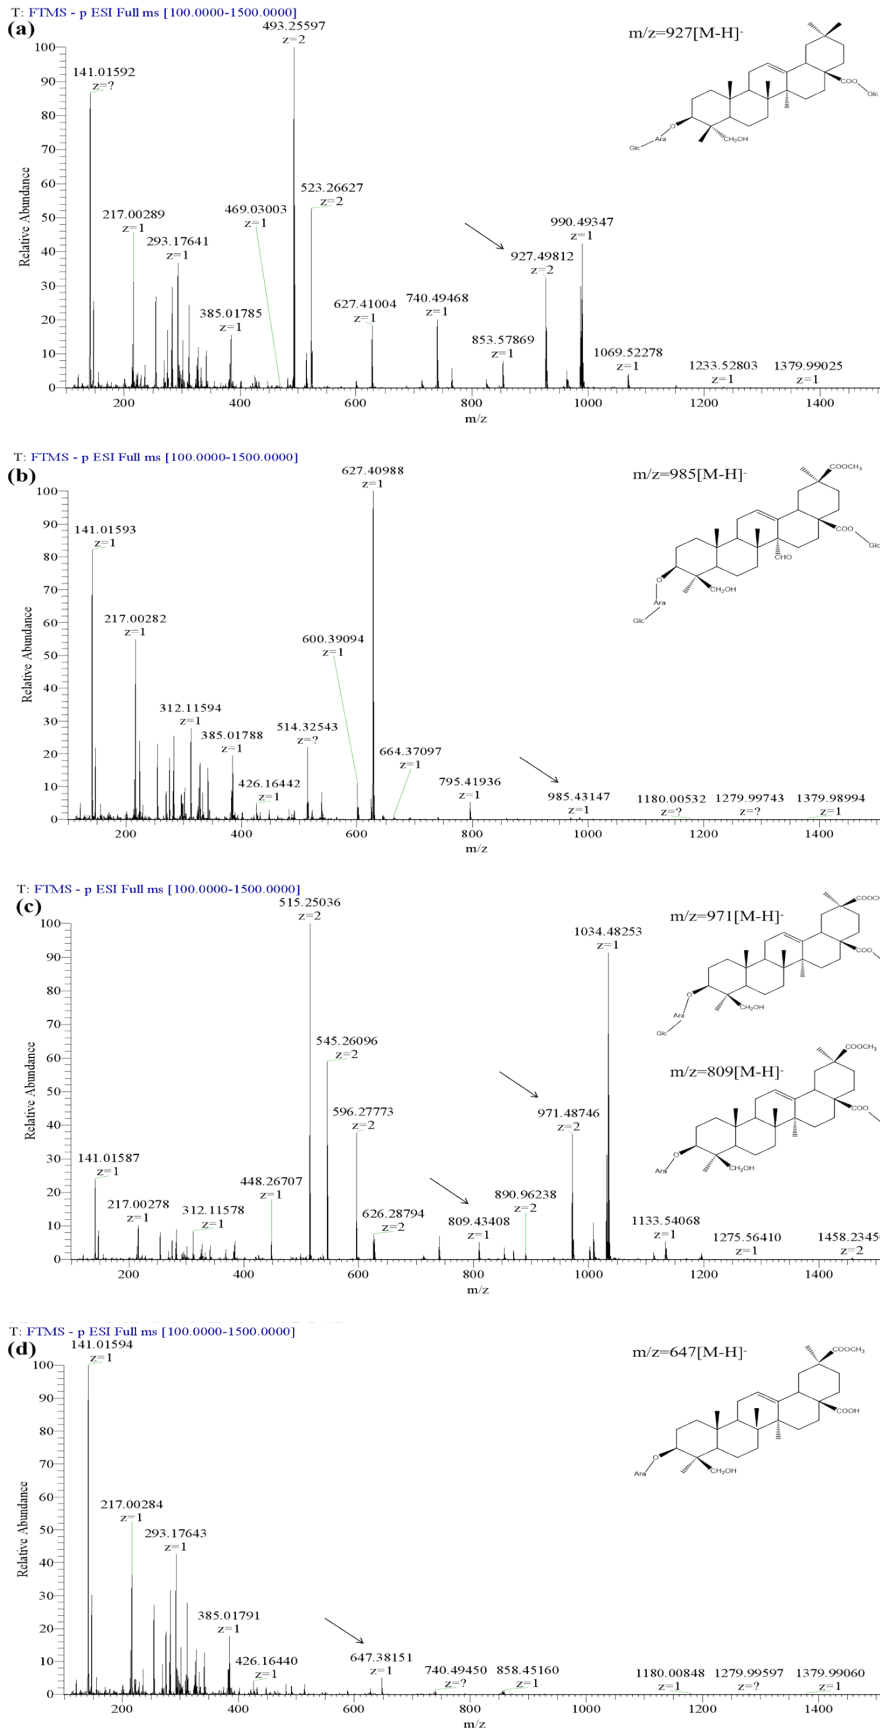

**Fig. S2.** Major saponin fragment ion peaks of DES extract: fragment ion peak of  $m/z = 927$  (a),  $m/z = 985$  (b),  $m/z = 971$ (c),  $m/z = 809$ (c) and  $m/z = 647$ (d)

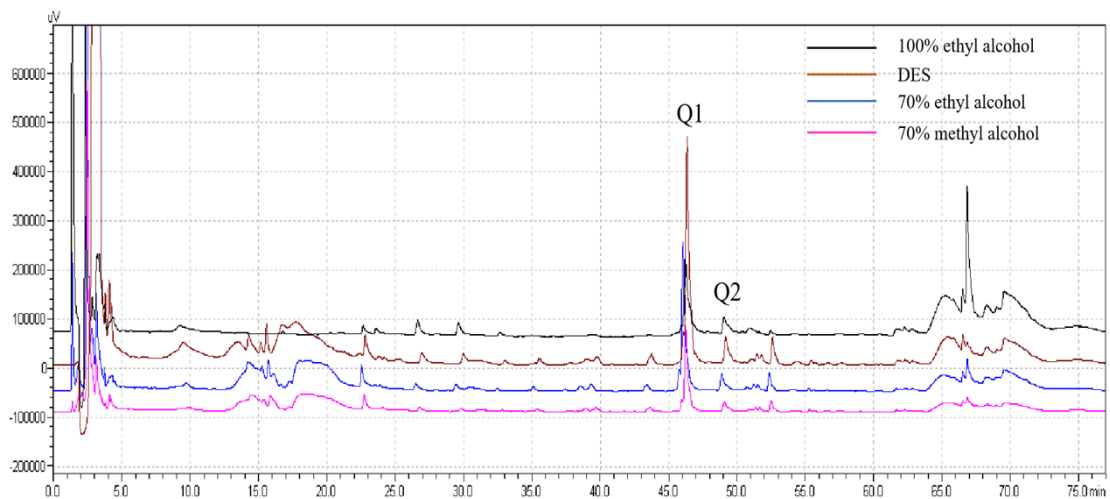

**Fig. S3.** Comparison of HPLC of quinoa saponins extracted by different extraction solvents

**Table S1.** MS information of major saponins in DES extracts

| No. | Negative ion mode<br>[M-H] <sup>-</sup> | Compound                                                                                                          | Formula                                         | Retention<br>time (min) | Type                             |
|-----|-----------------------------------------|-------------------------------------------------------------------------------------------------------------------|-------------------------------------------------|-------------------------|----------------------------------|
| 1   | 927                                     | 3-O-β-D-glucopyranosyl-(1→3)-<br>α-L-arabinopyranosyl<br>hederagenin-28-O-β-D-<br>glucopyranosyl                  | C <sub>47</sub> H <sub>76</sub> O <sub>18</sub> | 17                      | Hederagenin                      |
| 2   | 985                                     | 3-O-β-D-glucopyranosyl-(1→3)-<br>α-L-arabinopyranosyl-<br>phytolaccagenic acid-27-oxo-28-<br>O-β-D-glucopyranosyl | C <sub>48</sub> H <sub>74</sub> O <sub>21</sub> | 13                      | Hederagenin                      |
| 3   | 971                                     | 3-O-β-D-glucopyranosyl-(1→3)-<br>α-L-arabino -pyranosyl-<br>phytolaccagenic acid 28-O-β-D-<br>glucopyranosyl      | C <sub>48</sub> H <sub>76</sub> O <sub>20</sub> | 16                      | Phytolaccagenic<br>acid saponins |
| 4   | 809                                     | 3-O-α-L-arab-inopyranosyl<br>phytolaccagenic acid 28-O-β-D-<br>glucopyranosyl ester                               | C <sub>42</sub> H <sub>66</sub> O <sub>15</sub> | 16                      | Phytolaccagenic<br>acid saponins |
| 5   | 647                                     | 3-O-α-L-arabinopyranosyl-<br>phytolaccagenic acid                                                                 | C <sub>36</sub> H <sub>56</sub> O <sub>10</sub> | 18                      | Phytolaccagenic<br>acid saponins |

**Table S2.** This article compares with other extraction methods

| Extract solvents                                  | Extract the substance                                                    | Saponins (types) | Activities                              |
|---------------------------------------------------|--------------------------------------------------------------------------|------------------|-----------------------------------------|
| DES(choline chloride: 1,2-propylene glycol)       | Quinoa <i>Chenopodium quinoa</i> willd. husks                            | 5                | Antioxidant activity                    |
| DES (choline chloride and glycerol) <sup>15</sup> | Quinoa seeds                                                             | 11               | —                                       |
| Ethanol <sup>9</sup>                              | <i>Chenopodium quinoa</i> Wild                                           | 4                | Foaming and emulsifying characteristics |
| physical method <sup>5</sup>                      | Quinoa<br>( <i>Chenopodium quinoa</i> Willd.)<br>Genotypes from Colombia | —                | —                                       |
